# Supplementary material
Source: Springer Nature journal article supplement (https://mijn.bsl.nl/resource/supplementary/13047_2012_474_MOESM1_ESM.pdf/7111576)

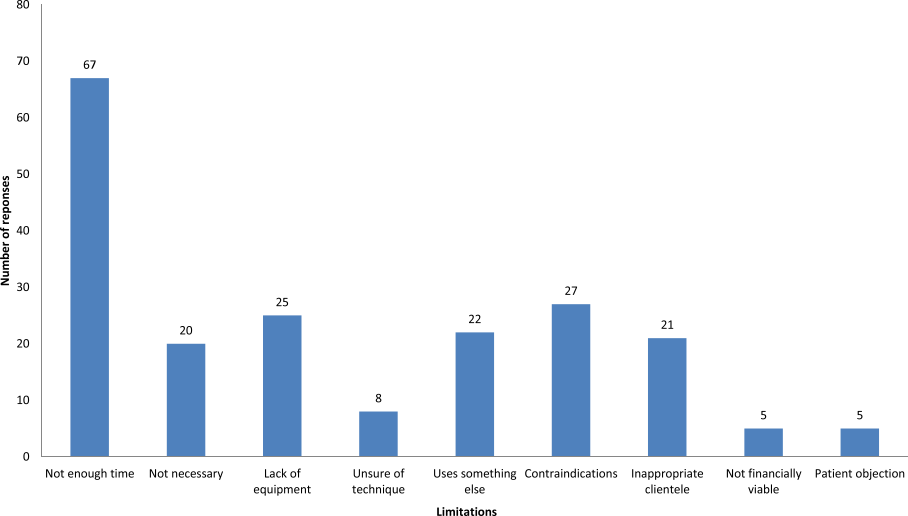

Supplement: MOESM1 [file 7111576]
